# Supplementary material for: Optimization of Dam Operation and Interaction with Groundwater: An Overview Focusing on Greece
Source: MDPI journal article supplement (doi:10.3390/w15213852), 2023-11-04
Supplement: s1 [file s1]

**Table S1.** Characteristics of dams in Greece.

| <b>Name</b>         | <b>Year</b> | <b>City</b>     | <b>Length<br/>(m)</b> | <b>Height<br/>(m)</b> |
|---------------------|-------------|-----------------|-----------------------|-----------------------|
| <b>Thisauros</b>    | 1996        | Drama           | 480                   | 172                   |
| <b>Kremasta</b>     | 1965        | Evritania       | 460                   | 165                   |
| <b>Mesoxwra</b>     | 2020        | Trikala         | 340                   | 151                   |
| <b>Morna</b>        | 1979        | Fokida          | 815                   | 139                   |
| <b>Ilarion</b>      | 2012        | Kozani          | 540                   | 130                   |
| <b>Evinos</b>       | 2001        | Aitoloakarnania | 640                   | 127                   |
| <b>Polifito</b>     | 1974        | Kozani          | 296                   | 112                   |
| <b>Smokovos</b>     | 2002        | Karditsa        | 456                   | 104                   |
| <b>Pournari</b>     | 1981        | Arta            | 580                   | 102                   |
| <b>Kastraki</b>     | 1969        | Aitoloakarnania | 547                   | 96                    |
| <b>Platanovrusi</b> | 1998        | Drama           | 270                   | 95                    |
| <b>Tauropos</b>     | 1959        | Karditsa        | 220                   | 83                    |
| <b>Sfikia</b>       | 1985        | Imathia         | 220                   | 82                    |
| <b>Piges Aoou</b>   | 1989        | Ioannina        | 300                   | 78                    |
| <b>Faneromeni</b>   | 2004        | Iraklio         | 484                   | 75                    |
| <b>Gadoura</b>      | 2007        | Rodos           | 585                   | 67                    |
| <b>Papadias</b>     | 2008        | Florina         | 540                   | 67                    |
| <b>Aposalemi</b>    | 2012        | Iraklio         | 660                   | 61                    |
| <b>Pramoritsa</b>   | 2007        | Kozani          | 195                   | 57                    |
| <b>Ladona</b>       | 1955        | Arkadia         | 102                   | 56                    |
| <b>Feneos</b>       | 1996        | Korinthos       | 225                   | 56                    |
| <b>Potamos</b>      | 2008        | Rethymno        | 265                   | 55                    |
| <b>Marathona</b>    | 1929        | Attiki          | 285                   | 54                    |
| <b>Gratini</b>      | 2002        | Rodopi          | 396                   | 53                    |

|                          |      |            |     |    |
|--------------------------|------|------------|-----|----|
| <b>Asomata</b>           | 1985 | Imathia    | 205 | 52 |
| <b>Faneromeni Naxou</b>  | 2004 | Naxos      | 270 | 52 |
| <b>Pineios Ilias</b>     | 1966 | Ilia       | 220 | 50 |
| <b>Vraxos</b>            | 2010 | Kastoria   | 240 | 48 |
| <b>Livadi Larisas</b>    | 2005 | Larisa     | 245 | 45 |
| <b>Dipotamos</b>         | 2005 | Evros      | 200 | 44 |
| <b>Mpramianos</b>        | 1987 | Lasithi    | 600 | 44 |
| <b>Eresos</b>            | 2002 | Lesvos     | 350 | 41 |
| <b>Leukogeia</b>         | 1994 | Drama      | 360 | 41 |
| <b>Aoos</b>              | 1990 | Ioannina   | 235 | 40 |
| <b>Kalamoti</b>          | 2008 | Hios       | 340 | 40 |
| <b>Apolakia</b>          | 1987 | Rodos      | 365 | 39 |
| <b>Kalivas</b>           | 2008 | Evros      | 350 | 39 |
| <b>Rapentossa</b>        | 2004 | Attiki     | 145 | 39 |
| <b>Inio</b>              | 2008 | Iraklio    | 300 | 38 |
| <b>Panagiotiko</b>       | 2003 | Magnisia   | 150 | 38 |
| <b>Metallio</b>          | 1999 | Kilkis     | 159 | 38 |
| <b>Sarapiou</b>          | 2011 | Hios       | 170 | 35 |
| <b>Sissanio</b>          | 2006 | Kozani     | 122 | 35 |
| <b>Katafito</b>          | 2001 | Drama      | 300 | 34 |
| <b>Lithaios</b>          | 2020 | Trikala    |     | 32 |
| <b>Livadi Astipalaia</b> | 1997 | Astipalaia | 235 | 32 |
| <b>Mesovouni</b>         | 2009 | Kozani     | 325 | 32 |
| <b>Ano Merias</b>        | 1997 | Mikonos    | 170 | 31 |
| <b>Livadi Patmos</b>     | 2005 | Patmos     | 224 | 30 |
| <b>Marathos</b>          | 1992 | Mikonos    | 265 | 30 |
| <b>Pente alonia 1</b>    | 1990 | Ioannina   | 286 | 30 |

|                       |      |                        |      |    |
|-----------------------|------|------------------------|------|----|
| <b>Perdika</b>        | 1962 | Kozani                 | 352  | 30 |
| <b>Steno</b>          | 2003 | Serifos                | 168  | 30 |
| <b>Kolhiko</b>        | 2009 | Florina                | 196  | 29 |
| <b>Raxes</b>          | 1995 | Ikaria                 | 235  | 29 |
| <b>Askiton</b>        | 2000 | Rodopi                 |      | 28 |
| <b>Dafnozonaras</b>   | 2010 | Evritania              | 150  | 28 |
| <b>Deskati 2</b>      | 2006 | Grevena                | 470  | 28 |
| <b>Kastania</b>       | 2011 | Magnisia<br>(Αλόνησος) | 250  | 28 |
| <b>Krania Livadia</b> | 2000 | Larisa                 |      | 28 |
| <b>Germas</b>         | 2006 | Kastoria               | 225  | 27 |
| <b>Partheni</b>       | 2002 | Leroa                  | 185  | 26 |
| <b>Strato</b>         | 1988 | Aitoloakarnania        | 1900 | 26 |
| <b>Akri Loutrou</b>   | 2003 | Iarisa                 |      | 25 |
| <b>Vasilika</b>       | 1996 | Thessaloniki           |      | 25 |
| <b>Kontia</b>         | 1976 | Limnos                 | 254  | 25 |
| <b>Livadi Kasteli</b> | 2001 | Larisa                 |      | 25 |
| <b>Lofos</b>          | 1993 | Larisa                 | 150  | 25 |
| <b>Mesimeri</b>       | 2008 | Pella                  | 120  | 25 |
| <b>Politson 3</b>     | 1990 | Ioannina               | 180  | 25 |
| <b>Folias</b>         | 1995 | Kavala                 | 137  | 25 |
| <b>Logga</b>          | 2000 | Trikala                | 250  | 24 |
| <b>Palaiopriono</b>   | 2008 | Imathia                | 124  | 24 |
| <b>Zifias</b>         | 1994 | Xios                   | 215  | 23 |
| <b>Kalivia</b>        | 1992 | Larisa                 |      | 23 |
| <b>Loutro</b>         | 2001 | Larisa                 |      | 23 |
| <b>Morna</b>          | 2007 | Pieria                 |      | 23 |

|                       |      |              |      |    |
|-----------------------|------|--------------|------|----|
| <b>Milopota</b>       | 1995 | Ios          | 120  | 23 |
| <b>Asproklisia</b>    | 2009 | Trikala      | 81   | 22 |
| <b>Vaketas</b>        | 2008 | Tinos        | 116  | 22 |
| <b>Louros</b>         | 1954 | Preveza      | 97   | 22 |
| <b>Krania Karia</b>   | 1993 | Larisa       |      | 21 |
| <b>Muranaioi</b>      | 1992 | Grevena      | 95   | 21 |
| <b>Skepari</b>        | 2010 | Trikala      | 107  | 21 |
| <b>Agia Varvara</b>   | 2007 | Imathia      | 2400 | 20 |
| <b>Eksarha</b>        | 2001 | Grevena      | 140  | 20 |
| <b>Kamares</b>        | 2008 | Sifnos       | 67   | 20 |
| <b>Karpero</b>        | 2008 | Grevena      | 170  | 20 |
| <b>Kokkinopilos</b>   | 1985 | Larisa       |      | 20 |
| <b>Ahelinadika</b>    | 2001 | Trikala      |      | 20 |
| <b>Logmis</b>         | 1992 | Grevena      |      | 20 |
| <b>Likos</b>          | 2007 | Pella        | 94   | 20 |
| <b>Liras</b>          | 2003 | Evros        | 90   | 20 |
| <b>Miloxori</b>       | 2009 | Kozani       | 319  | 20 |
| <b>Pentaplatanos</b>  | 2008 | Pella        | 104  | 20 |
| <b>Platani</b>        | 2007 | Pella        | 78   | 20 |
| <b>Pournari Ornia</b> | 2001 | Larisa       |      | 20 |
| <b>Taxiarhi</b>       | 2006 | Grevena      | 160  | 20 |
| <b>Deskati</b>        | 1997 | Grevena      | 100  | 19 |
| <b>Agios Antonios</b> | 2001 | Thessaloniki | 210  | 19 |
| <b>Agios Georgios</b> | 1996 | Grevena      | 110  | 19 |
| <b>Itea</b>           | 2006 | Grevena      | 100  | 19 |
| <b>kentro</b>         | 1995 | Grevena      | 130  | 19 |
| <b>Katakali</b>       | 1995 | Grevena      | 100  | 19 |

|                                 |      |              |       |    |
|---------------------------------|------|--------------|-------|----|
| <b>Roukouna</b>                 | 2009 | Anafi        | 104   | 19 |
| <b>Felli</b>                    | 1995 | Grevena      | 120   | 19 |
| <b>Megalo<br/>Eleutheroxwri</b> | 1996 | Larisa       | 125   | 18 |
| <b>Politson 1</b>               | 1990 | Ioannina     | 130   | 18 |
| <b>Prodromos Deskatis</b>       | 1999 | Grevena      | 140   | 18 |
| <b>Anoiksi</b>                  | 1995 | Grevena      | 120   | 17 |
| <b>Aimilianos</b>               | 1995 | Grevena      | 150   | 17 |
| <b>Ardani</b>                   | 2004 | Evros        | 250   | 17 |
| <b>Vasileiades</b>              | 2008 | Kastoria     | 490   | 17 |
| <b>Karatza</b>                  | 2010 | Attiki       | 420   | 17 |
| <b>Mpara</b>                    | 1995 | Grevena      | 120   | 17 |
| <b>Pente alonia 2</b>           | 1990 | Ioannina     | 180   | 17 |
| <b>Girtoni</b>                  | 2010 | larisa       | 115   | 16 |
| <b>Dasoxori Deskatis</b>        | 1997 | Grevena      | 210   | 16 |
| <b>Theodorakeio</b>             | 2007 | Pella        | 73    | 16 |
| <b>Lithotopos</b>               | 1982 | Σερρών       | 15000 | 16 |
| <b>Provatona</b>                | 2005 | Evros        | 92    | 16 |
| <b>Vathis</b>                   | 1992 | Kilkis       | 190   | 15 |
| <b>Eggara</b>                   | 1994 | Naxos        | 220   | 15 |
| <b>Eptalofos</b>                | 1989 | Kilkis       |       | 15 |
| <b>Thermis</b>                  | 1993 | Thessaloniki |       | 15 |
| <b>Kaki Lagada</b>              | 1998 | Paxoi        | 260   | 15 |
| <b>Livadas</b>                  | 2003 | Tinos        | 780   | 15 |
| <b>Moni Agios<br/>Grigorios</b> | 1994 | Agio Oros    |       | 15 |
| <b>Palaioxorio</b>              | 1998 | Grevena      |       | 15 |

|                   |      |          |       |    |
|-------------------|------|----------|-------|----|
| <b>Politson 2</b> | 1990 | Ioannina | 130   | 15 |
| <b>Pournari 2</b> | 1998 | Arta     | 2000  | 15 |
| <b>Tourlou</b>    | 2001 | Paros    | 76    | 15 |
| <b>Taka</b>       | 2009 | Arkadia  | 4000  | 13 |
| <b>Artzan</b>     | 2009 | Kilkis   | 5250  | 10 |
| <b>Karla</b>      | 2010 | Magnisia | 21800 | 8  |

**Table S2** Overview of algorithm application for dam operation.

|          | Authors                                   | Parameters<br>Optimization                                                              | Type                                 | Method-Tools                                                                   | Dam Scope                                                                                                                     | Dam Name                                                                      | Country  |
|----------|-------------------------------------------|-----------------------------------------------------------------------------------------|--------------------------------------|--------------------------------------------------------------------------------|-------------------------------------------------------------------------------------------------------------------------------|-------------------------------------------------------------------------------|----------|
| <b>1</b> | <a href="#">Cai et al. [52]</a>           | hydropower<br>production,<br>ecological flow                                            | Single Objective                     | Genetic<br>Algorithms                                                          | function for flood<br>control,<br>navigation, power<br>generation                                                             | Three Gorges,<br>Gezhouba                                                     | China    |
| <b>2</b> | <a href="#">Tospornsampan et al. [53]</a> | hydropower<br>production,saliniy<br>control,downstream<br>requirements                  | Single Objective                     | simulated<br>annealing                                                         | irrigation,<br>hydropower<br>production                                                                                       | Vajiralongkorn,<br>Srinagarind and<br>Tha Thung<br>(Mae Klong<br>River Basin) | Thailand |
| <b>3</b> | <a href="#">Tospornsampan et al. [54]</a> | minimizing the<br>total irrigation<br>deficits during a<br>critical drought year        | Single Objective                     | genetic<br>algorithm and<br>discrete<br>differential<br>dynamic<br>programming | irrigation,<br>hydropower<br>generation,<br>domestic and<br>industrial<br>water supply,<br>recreation and<br>salinity control | Mae Klong<br>system                                                           | Thailand |
| <b>4</b> | <a href="#">Ahmadianfar et al. [55]</a>   | volume of released<br>water and stored<br>water in reservoir,two<br>objective functions | simulation-<br>multioptimizatio<br>n | fuzzy set<br>theory-genetic<br>algorithm<br>(NSGA-II)                          | irrigation,water<br>supply                                                                                                    | Zohre                                                                         | Iran     |

|   |                                            |                                                                                                 |                                                 |                                                                                  |                                                                                     |                                 |        |
|---|--------------------------------------------|-------------------------------------------------------------------------------------------------|-------------------------------------------------|----------------------------------------------------------------------------------|-------------------------------------------------------------------------------------|---------------------------------|--------|
|   |                                            | involving water supply of minimum flow and agriculture demands in a long-term simulation period |                                                 |                                                                                  |                                                                                     |                                 |        |
| 5 | <a href="#">Chang and Chang [56]</a>       | minimize the shortage indices produced by joint reservoir operation                             | multi-objective<br>Pareto                       | non-dominated sorting genetic algorithm (NSGA-II)                                | supplying the domestic and industrial water                                         | Feitsui and Shihmen             | Taiwan |
| 6 | <a href="#">Chen et al. [57]</a>           | minimization of the deficits of both the domestic water supply and the ecological water supply  | multi-objective<br>Pareto                       | particle swarm optimization (PSO)-adaptive random inertia weight (ARIW) strategy | flood control, water supply, hydroelectric power, and river ecological water supply | Panjiakou, Daheiting, Taolinkou | China  |
| 7 | <a href="#">Lei et al. [58]</a>            | hydropower generation                                                                           | Single Objective                                | Stochastic dynamic programming based on copula functions                         | hydropower generation, flood control                                                | Ertan                           | China  |
| 8 | <a href="#">Bashiri-Atrabi et al. [59]</a> | minimize the water supply deficit and flood damages downstream of a reservoir                   | Single Objective                                | Harmony search Algorithm                                                         | Flood management                                                                    | Narmab                          | Iran   |
| 9 | <a href="#">Yaseen. et al. [60]</a>        | minimize power shortage in Karun-4 power plant                                                  | Single Objective-<br>multi criteria<br>decision | Artificial Fish Swarm Algorithm, Particle Swarm Optimization Algorithm, Hy       | hydropower production                                                               | Karun-4 Dam                     | Iran   |

|    |                                           |                                                                                                         |                                  |                                                                                                               |                                    |                      |      |
|----|-------------------------------------------|---------------------------------------------------------------------------------------------------------|----------------------------------|---------------------------------------------------------------------------------------------------------------|------------------------------------|----------------------|------|
|    |                                           |                                                                                                         |                                  | brid Algorithm<br>(HA)                                                                                        |                                    |                      |      |
| 10 | <a href="#">Ehteram et al. [61]</a>       | decreasing irrigation deficiencies                                                                      | Single Objective                 | Spider Monkey Algorithm-Genetic Algorithm-Particle Swarm Algorithm                                            | irrigation                         | Golestan and Voshmgi | Iran |
| 11 | <a href="#">Goodarzi et al. [62]</a>      | maximize the total reservoir release by considering domestic, industrial, and environmental demands     | simulation-optimization (single) | simulation (HEC-RAS)-optimization liner LINGO                                                                 | irrigation, water supply           | Chadegan             | Iran |
| 12 | <a href="#">Malekmohammad et al. [63]</a> | estimates the optimal hourly reservoirs' releases to minimize the flood damages in the downstream river | Single Objective-Real Time       | Genetic Algorithm (GA), Geographical Information System (GIS), K-Nearest Neighbor (K-NN) algorithm-Hec-GeoRAS | irrigation,hydropower production   | Dez                  | Iran |
| 13 | <a href="#">Saadat and Asghari [64]</a>   | reservoir operating policies( reservoir volume and inflow to reservoir)                                 | Single Objective                 | Stochastic Dynamic Programming                                                                                | water supply,hydropower production | Zayandehrud          | Iran |



|    |                                              |                                                                                                         |                                              |                                                                                                              |                                    |             |       |
|----|----------------------------------------------|---------------------------------------------------------------------------------------------------------|----------------------------------------------|--------------------------------------------------------------------------------------------------------------|------------------------------------|-------------|-------|
| 14 | <a href="#">Afshar [65]</a>                  | water supply,hydropower production                                                                      | multi-objective                              | Particle Swarm Optimization (PSO) - (PCPSO) - (FCPSO)                                                        | irrigation,hydropower production   | Dez         | Iran  |
| 15 | <a href="#">Afshar et al. [66]</a>           | Water quality, hydrodynamic model (CE-QUAL-W2)                                                          | multi-objective,simulation-multioptimization | multiobjective particle swarm optimization (MOPSO)                                                           | drinking water,agricultural water  | Karkheh     | Iran  |
| 16 | <a href="#">Saber et al. [67]</a>            | difference between monthly downstream demands and release                                               | Single Objective                             | PSO algorithm                                                                                                | irrigation,hydropower production   | Mahabad     | Iran  |
| 17 | <a href="#">Kerachian, and Karamouz [68]</a> | Salinity, Thermal Stratification and Water Quality Simulation Model                                     | simulation-optimization (single)             | genetic algorithms (VLGA)                                                                                    | irrigation,water supply,           | 15-Khordad  | Iran  |
| 18 | <a href="#">Ganji et al. [69]</a>            | storage, inflow and forecasted inflow of the current month                                              | Single Objective                             | Game Theore, Nash Game - (PSDNG)                                                                             | water supply,hydropower production | Zayandehrud | Iran  |
| 19 | <a href="#">Malekmohammad et al. [70]</a>    | estimates the optimal hourly reservoirs' releases to minimize the flood damages in the downstream river | Single Objective-Real Time                   | Genetic Algorithm (GA), Geographical Information System (GIS),K-Nearest Neighbor (K-NN) algorithm-Hec-GeoRAS | irrigation,hydropower production   | Dez         | Iran  |
| 20 | <a href="#">Li and Lian [71]</a>             | sediment deposition, power generation                                                                   | multi-objective Pareto                       | particle swarm optimization                                                                                  | irrigation, hydropower production  | Wanjiashai  | China |

|    |                          |                                                                                                                                  |                                           |                                                                                      |                                                         |                        |       |
|----|--------------------------|----------------------------------------------------------------------------------------------------------------------------------|-------------------------------------------|--------------------------------------------------------------------------------------|---------------------------------------------------------|------------------------|-------|
|    |                          |                                                                                                                                  |                                           | and an improved multi-objective particle swarm optimization                          |                                                         |                        |       |
| 21 | Li et al. [72]           | maximizing total energy production ,flood control, navigation, and river maintenance downstream raise the constraints            | Single Objective-daily optimization model | Dynamic Programming (IDP) and Genetic algorithm (GA)                                 | function of flood control, navigation, power generation | Three Gorges, Gezhouba | China |
| 22 | Bilal et al [73]         | initial reservoir storage , the resulting reservoir storage , the inflow to reservoir and the evaporation losses from reservoir. | Single Objective                          | hybridization of Dynamic Programming (DP) and Particle Swarm Optimization (PSO)      | irrigation,water supply                                 | Mula                   | India |
| 23 | Reddy & Kumar [74]       | maximize total relative yield,actual evapotranspiration and potential evapotranspiration                                         | Single Objective                          | modified version of Particle Swarm Optimization (PSO) named elitist-mutation (EMPSO) | irrigation                                              | Malaprabha             | India |
| 24 | Rani and Srivastava [75] | The objective function is minimization of squared deviation of releases from target demands                                      | Single Objective                          | dynamic programming and genetic algorithm                                            | irrigation, water supply                                | Mula                   | India |

|    |                                               |                                                                                                                       |                            |                                                           |                                                               |                                                                                 |       |
|----|-----------------------------------------------|-----------------------------------------------------------------------------------------------------------------------|----------------------------|-----------------------------------------------------------|---------------------------------------------------------------|---------------------------------------------------------------------------------|-------|
| 25 | <a href="#">Kumar et al. [76]</a>             | optimizing reservoir operation for the optimal allocation of water for crops,maximize total relative yield over a yea | Single Objective           | genetic algorithm (GA) ,Particle swarm optimization (PSO) | irrigation,water supply                                       | Malaprabha                                                                      | India |
| 26 | <a href="#">Jothiprakash and Shanthi [77]</a> | minimize the annual sum of squared deviation form desired irrigation release and desired storage volume               | Single Objective           | Genetic Algorithm (GA)                                    | irrigation                                                    | Pechiparai                                                                      | India |
| 27 | <a href="#">Al-Aqeeli et al. [78]</a>         | maximize the annual hydropower generation- optimal monthly releases                                                   | Single Objective           | genetic algorithm optimization model (GAOM)               | irrigation,hydropower production                              | Mosul                                                                           | Iraq  |
| 28 | <a href="#">Dat et al. [79]</a>               | Optimal use of water for MAR,Slippage effect                                                                          | Single Objective           | non-linear optimization                                   | Irrigation, Groundwater level and maximum MAR injection rates | Eastern Arkansas                                                                | USA   |
| 29 | <a href="#">Hınçal et al. [80]</a>            | maximizing the energy production in the system                                                                        | Single Objective-Real Time | Genetic Algorithm                                         | hydropower production                                         | Blue Mesa, the Morrow Point and the Crystal Reservoirs (Colorado River Storage) | USA   |
